# Supplementary material
Source: publisher figshare collection journal article supplement (https://gsajournals.figshare.com/articles/dataset/_/16815100)

A

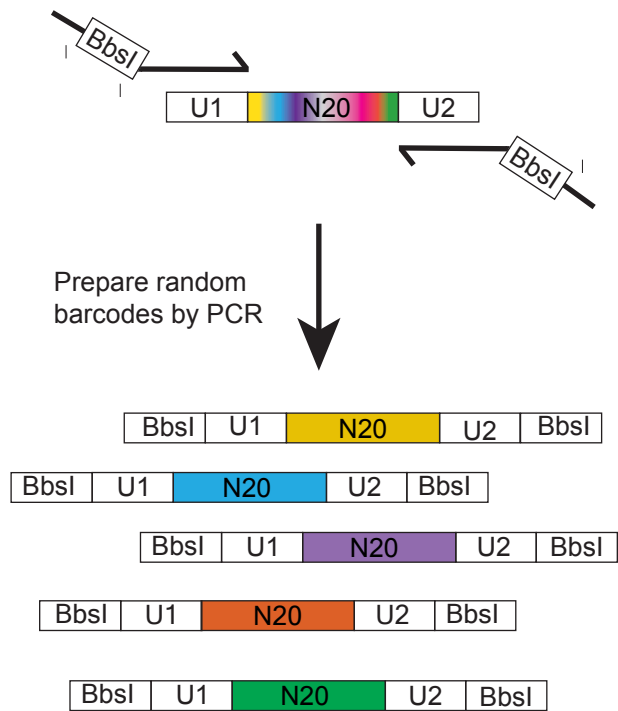

B

Prepare golden-gate-ready plasmid

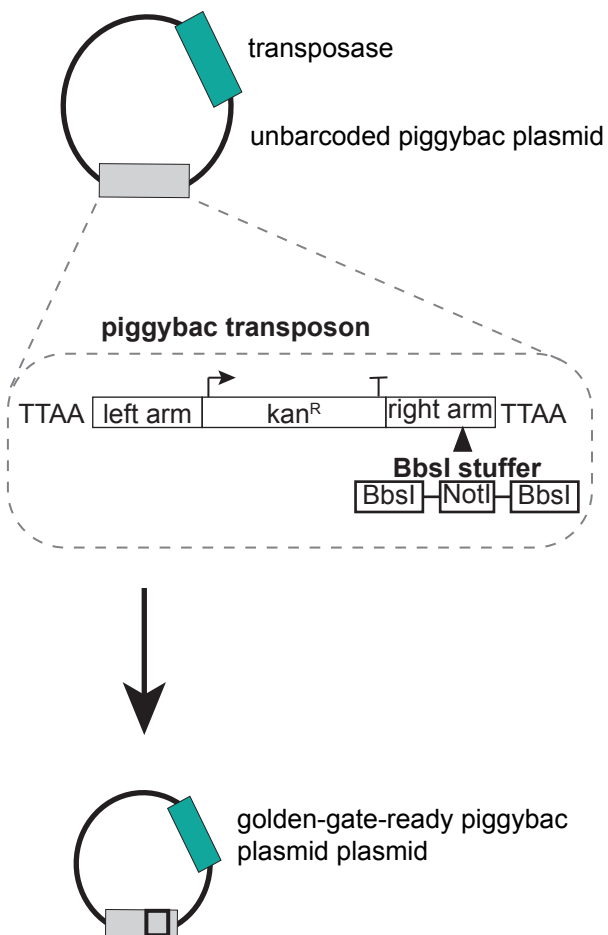

C

Random barcoding

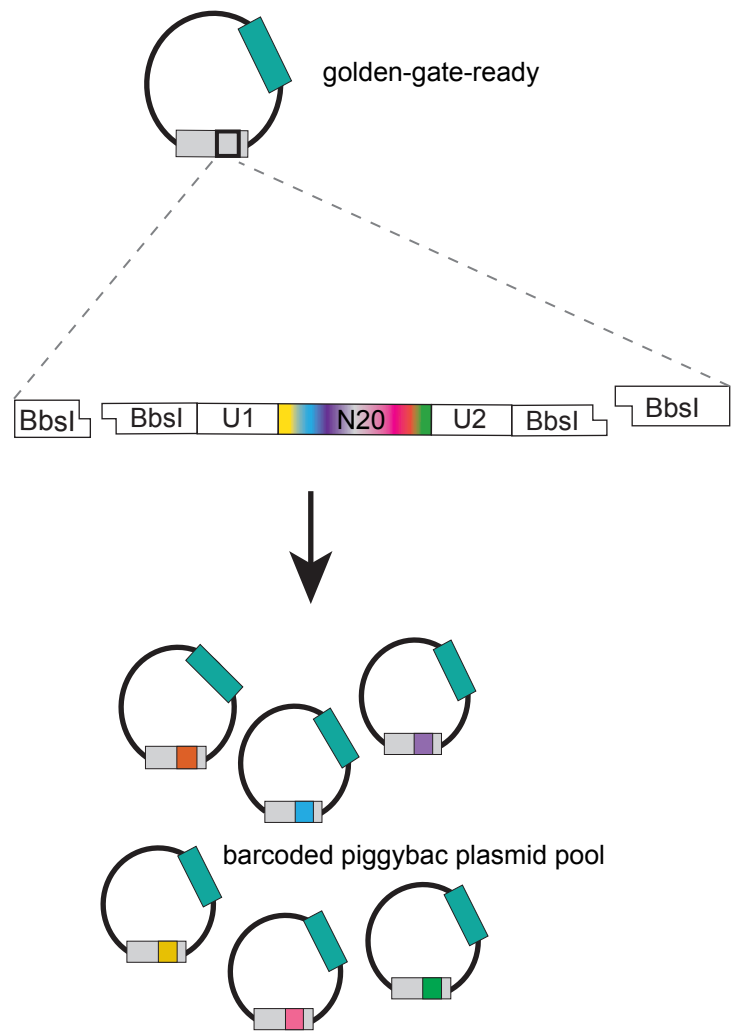

D

Transform  
Select on G418  
Counterselect on 5FOA

barcoded reciprocal hemizygote pool

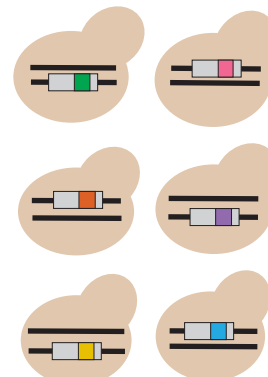

Supplement: Supplementary file [file 2]
