# Supplementary material
Source: publisher figshare collection journal article supplement (https://gsajournals.figshare.com/articles/dataset/_/16815100)

thermotolerance gene median      thermotolerance gene median, excluding *TAF2* and *BUL1*      genome wide median

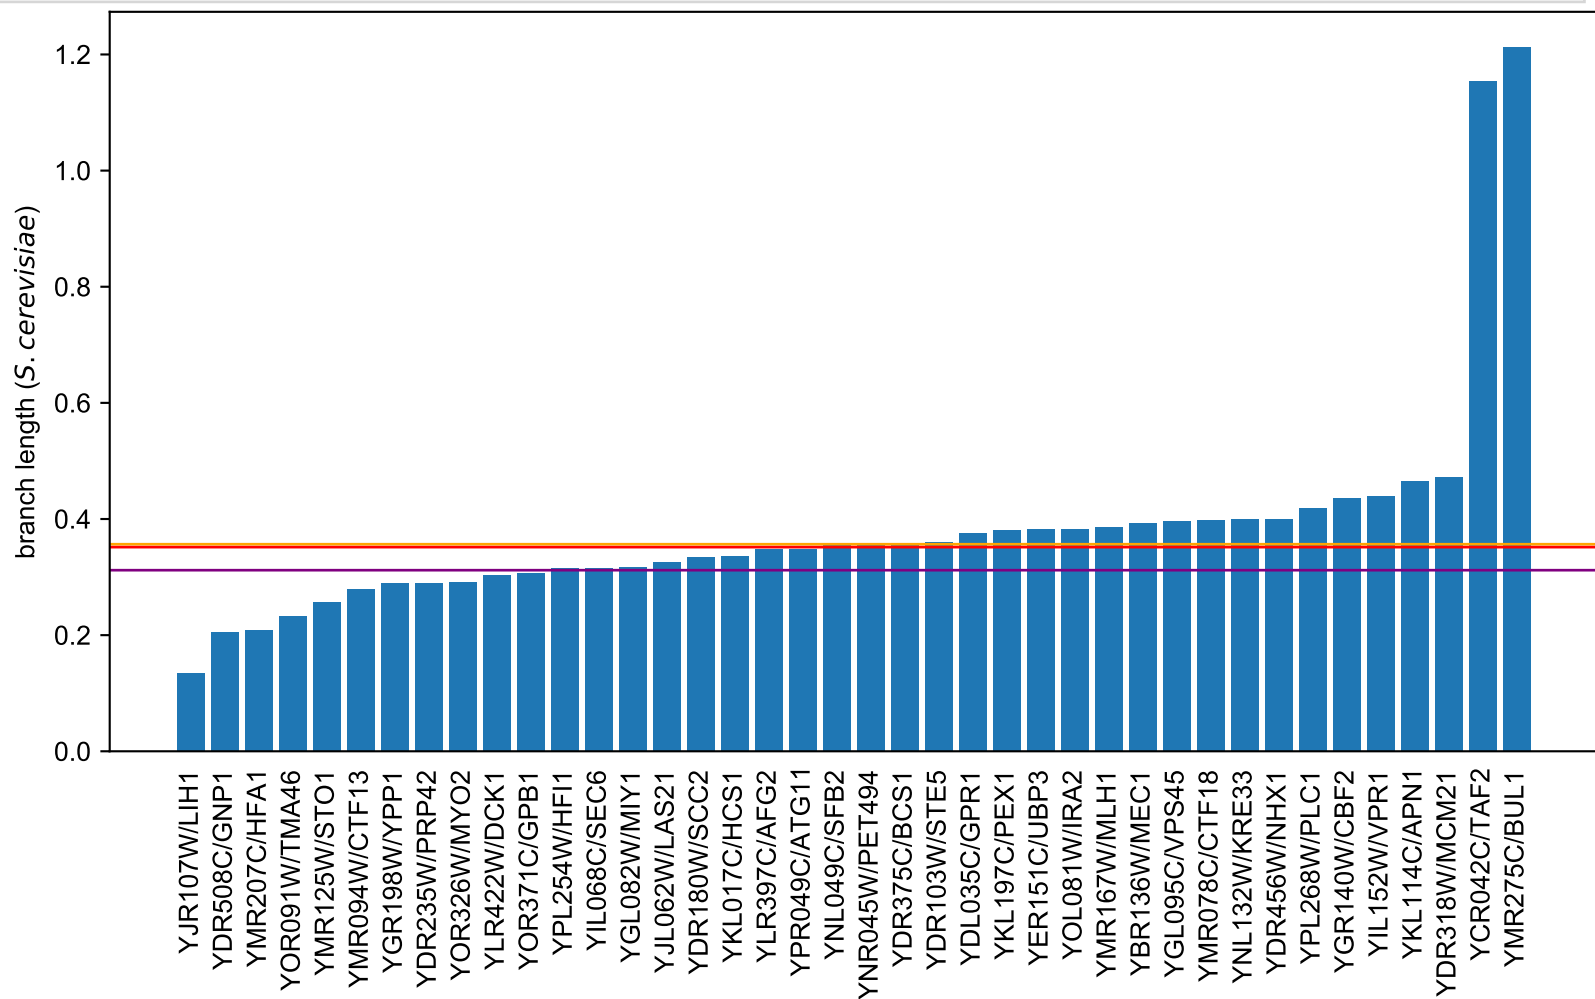

Supplement: Supplementary file [file 2]
