# Supplementary material
Source: publisher figshare collection journal article supplement (https://gsajournals.figshare.com/articles/dataset/_/16815100)

**A**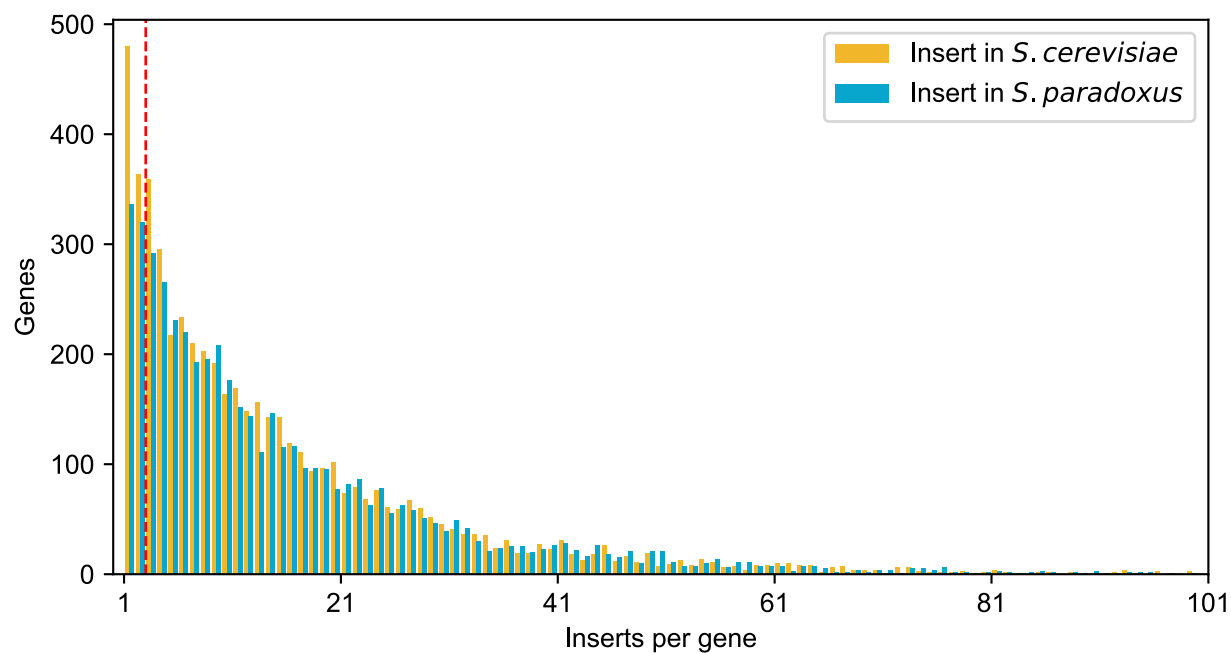**B**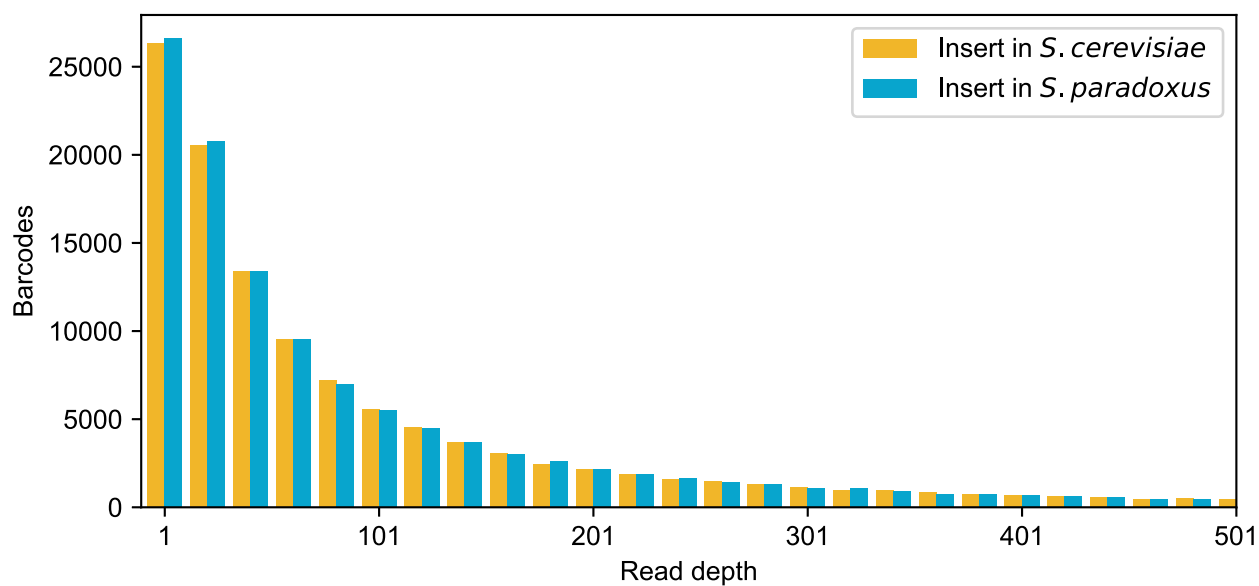**C**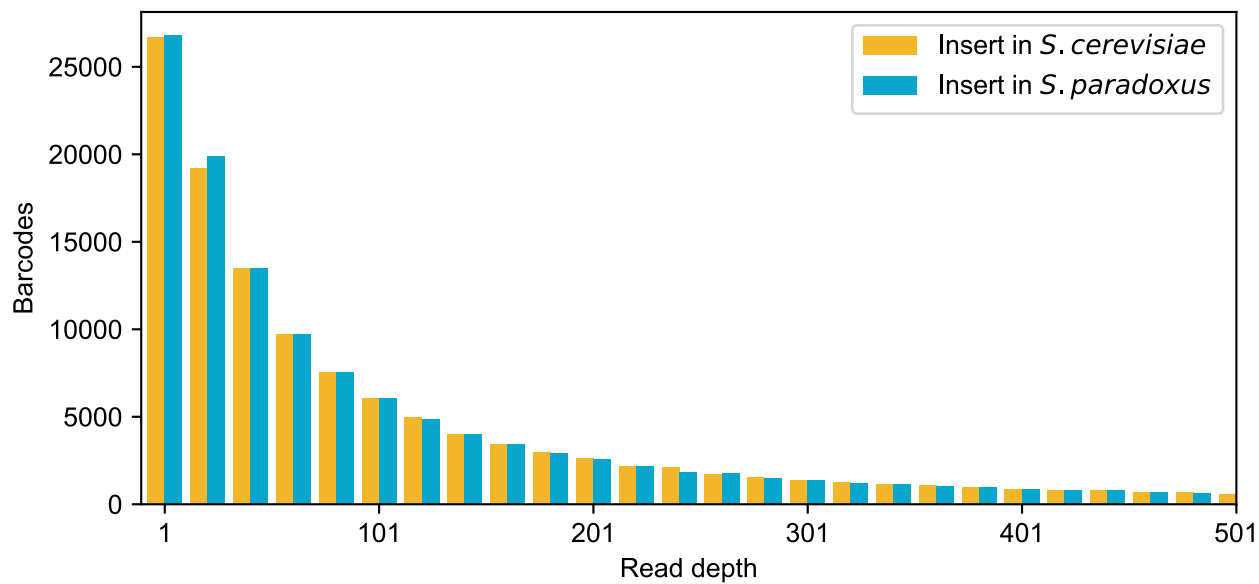

Supplement: Supplementary file [file 2]
