# Supplementary material
Source: publisher figshare collection journal article supplement (https://gsajournals.figshare.com/articles/dataset/_/16815100)

A

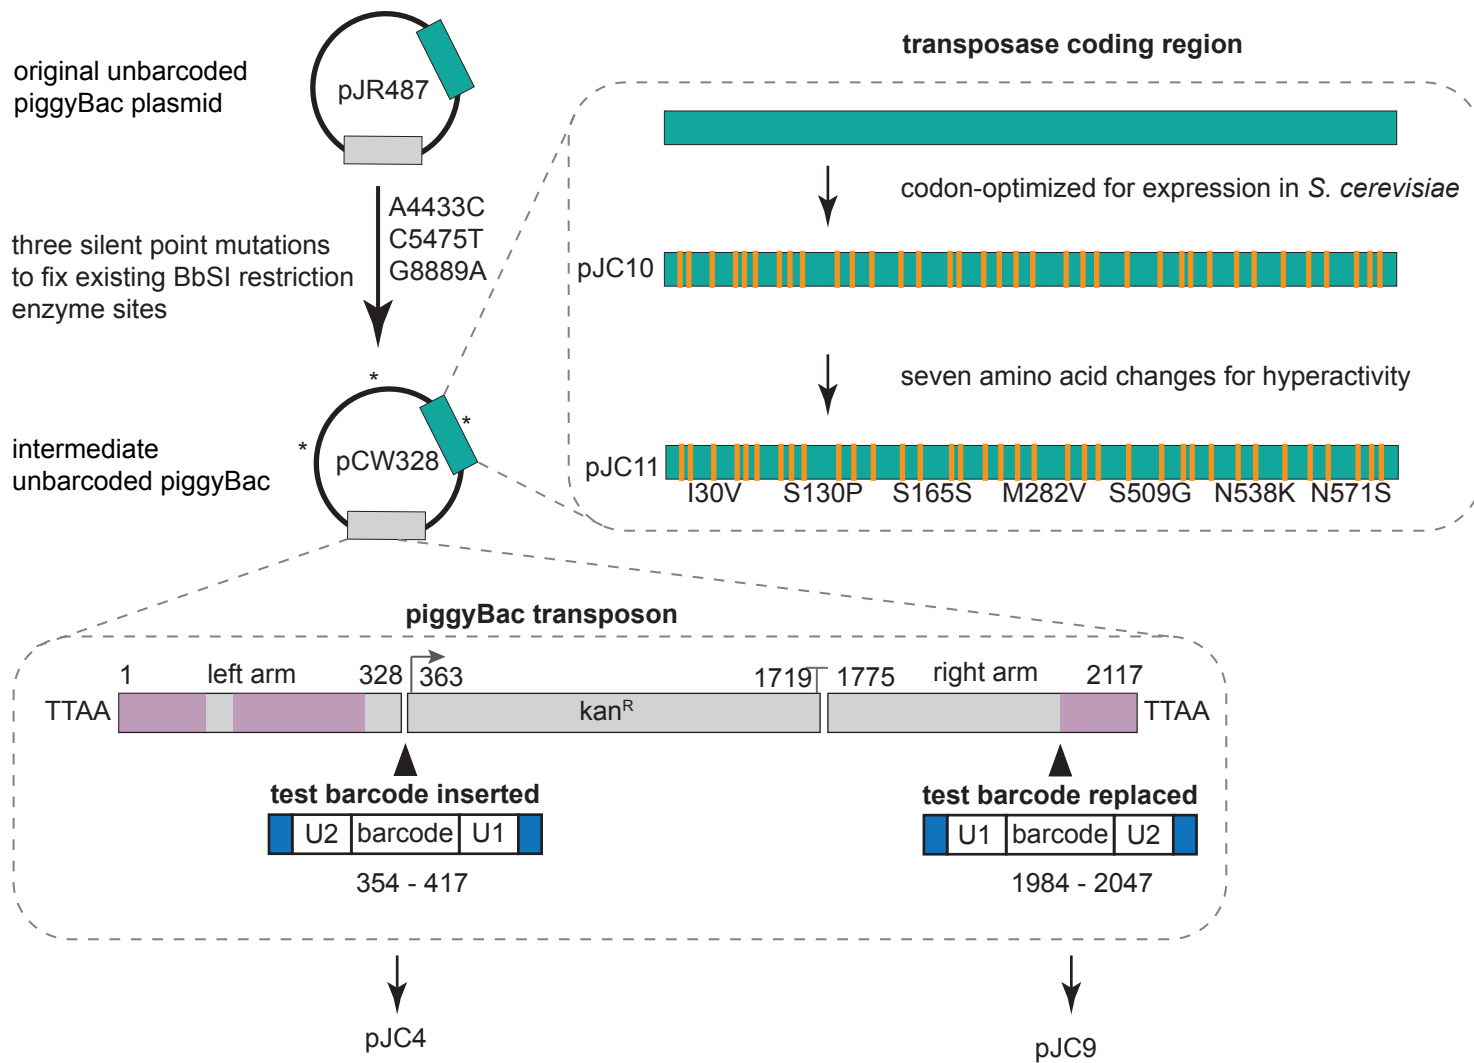

B

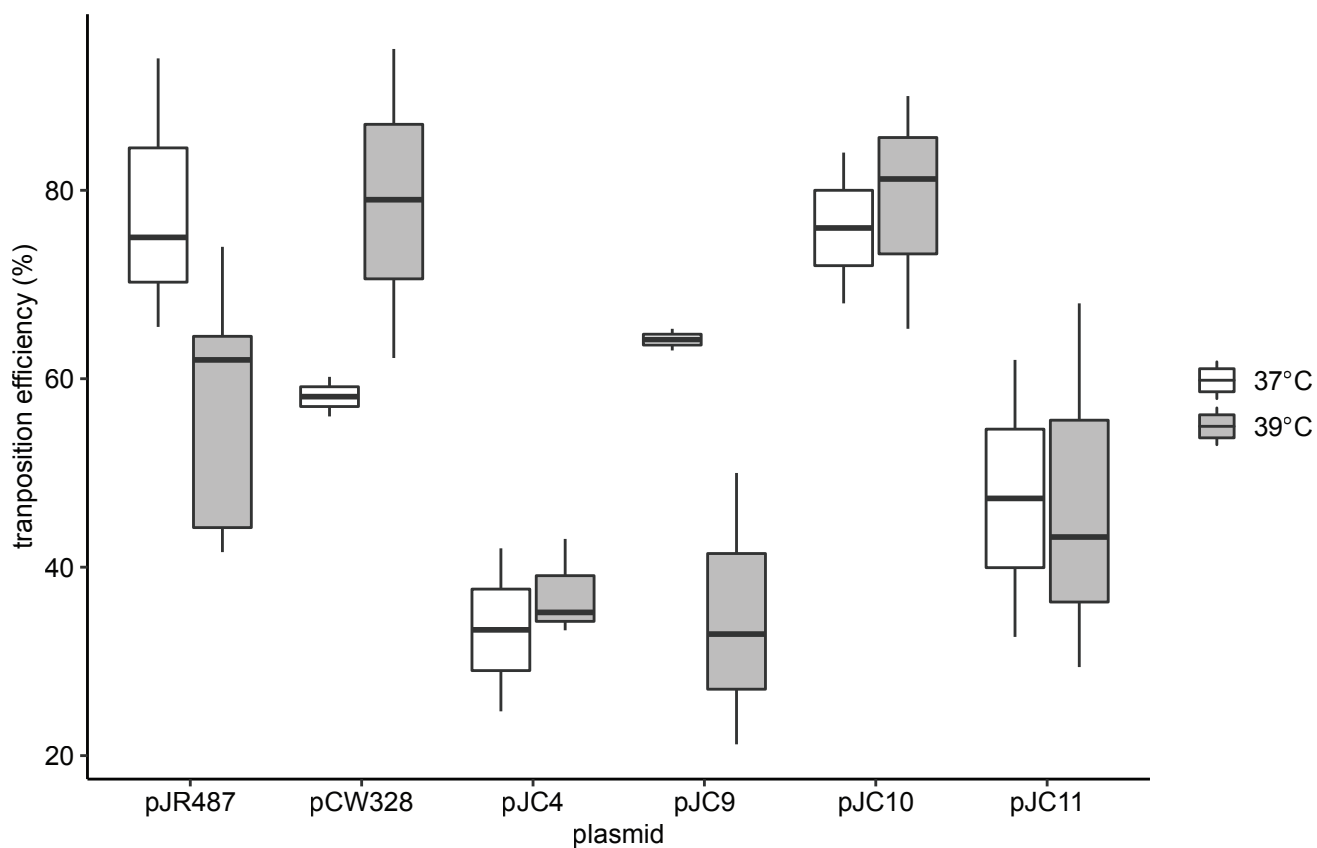

Supplement: Supplementary file 1 [file 2]
